# Supplementary material for: Clinical and Economic Impact of a Potential Switch from 13-Valent to 10-Valent Pneumococcal Conjugate Infant Vaccination in Canada
Source: Springer Nature journal article supplement (doi:10.1007/s40121-018-0206-1), 2018-06-22

## Supplementary Tables and Figures

**S1 Table 1. Serotype Coverage by Vaccine**

| Serotype | 4                           | 6B | 9V | 14 | 18C | 19F | 23F | 1         | 5 | 7F | 3 | 6A | 19A |  |
|----------|-----------------------------|----|----|----|-----|-----|-----|-----------|---|----|---|----|-----|--|
| PCV7     | Cross-reacting material 197 |    |    |    |     |     |     |           |   |    |   |    |     |  |
| PCV10    | Protein D                   |    |    |    | TT  | DT  |     | Protein D |   |    |   |    |     |  |
| PCV13    | Cross-reacting material 197 |    |    |    |     |     |     |           |   |    |   |    |     |  |

DT = conjugated to diphtheria toxoid; PCV7 = 7-valent pneumococcal conjugate vaccine; PCV10 = 10-valent pneumococcal conjugate vaccine; PCV13 = 13-valent pneumococcal conjugate vaccine; TT = conjugated to tetanus toxoid.

**S1 Table 2. Canada-specific Trend Lines by Serotype, Ages < 2 and 2-4**

| Serotype | Formula    |                       |        | R <sup>2</sup> | Formula Assumption                        | Covered Period | R <sup>2</sup> |
|----------|------------|-----------------------|--------|----------------|-------------------------------------------|----------------|----------------|
|          | Assumption | Noncovered Period     |        |                |                                           |                |                |
| 1        | Linear     | $y = -0.023x + 0.190$ | 0.1688 | –              | –                                         | –              |                |
| 3        | Linear     | $y = 0.185x + -0.190$ | 0.3776 | Logarithmic    | $y = (-0.262 \cdot \text{LN}(x)) + 1.298$ | 0.0910         |                |
| 4        | Linear     | $y = 0.045x + 0.471$  | 0.0166 | Exponential    | $0.000 \cdot e^{(-2.150x)}$               | 0.2722         |                |
| 5        | –          | –                     | –      | –              | –                                         | –              |                |
| 6A       | Linear     | $y = -0.187x + 1.975$ | 0.4830 | –              | –                                         | –              |                |
| 6B       | Linear     | $y = -0.373x + 6.952$ | 0.1560 | Logarithmic    | $y = (-1.037 \cdot \text{LN}(x)) + 2.124$ | 0.8248         |                |
| 7F       | Linear     | $y = 0.191x + -0.351$ | 0.4461 | Linear         | $y = -0.050x + 0.251$                     | 0.1250         |                |

|     |        |                         |        |             |                            |        |
|-----|--------|-------------------------|--------|-------------|----------------------------|--------|
| 9V  | Linear | $y = -0.788*x + 3.250$  | 0.9744 | Logarithmic | $y = (-0.254*LN(x))+0.533$ | 0.7347 |
| 14  | Linear | $y = -4.034*x + 18.334$ | 0.9990 | Logarithmic | $y = (-0.317*LN(x))+0.635$ | 0.5815 |
| 18C | Linear | $y = 0.552*x + 1.405$   | 0.6002 | Logarithmic | $y = (-0.570*LN(x))+1.213$ | 0.7416 |
| 19A | Linear | $y = 0.946*x + -1.487$  | 0.8245 | Linear      | $y = -1.259*x + 7.461$     | 0.7907 |
| 19F | Linear | $y = -0.376*x + 5.349$  | 0.1343 | Exponential | $241.004*e^{(-4.062x)}$    | 0.5610 |
| 23F | Linear | $y = -0.513*x + 3.260$  | 0.6696 | Linear      | $y = -0.044*x + 0.483$     | 0.1052 |
| NVT | Linear | $y = 0.460*x + 1.230$   | 0.6519 |             |                            |        |

NVT = nonvaccine type.

Note: “-” denotes that no cases of disease were observed due to this serotype in this age group during the period of interest. As such, no trend lines were applied.

**S1 Table 3. Canada-specific Trend Lines by Serotype, Ages 5-17**

| Serotype | Formula     |                             |                |             | Formula                    |                |  |
|----------|-------------|-----------------------------|----------------|-------------|----------------------------|----------------|--|
|          | Assumption  | Noncovered Period           | R <sup>2</sup> | Assumption  | Covered Period             | R <sup>2</sup> |  |
| 1        | -           | -                           | -              | -           | -                          | -              |  |
| 3        | Logarithmic | $y = (0.022*LN(x))+0.036$   | 0.0317         | Logarithmic | $y = (0.021*LN(x))+0.029$  | 0.0154         |  |
| 4        | Linear      | $y = 0.018*x + 0.087$       | 0.0668         | Linear      | $y = -0.006*x + 0.052$     | 0.1600         |  |
| 5        | -           | -                           | -              | -           | -                          | -              |  |
| 6A       | Logarithmic | $y = (0.035*LN(x))+ -0.001$ | 0.0933         | -           | -                          | -              |  |
| 6B       | Logarithmic | $y = (-0.200*LN(x))+0.290$  | 0.5276         | Power       | $y = 0.003*x^{(-10.611)}$  | 0.2283         |  |
| 7F       | Linear      | $y = 0.065*x + -0.161$      | 0.5008         | Logarithmic | $y = (-0.138*LN(x))+0.205$ | 0.7720         |  |

|     |             |                            |        |             |                            |        |
|-----|-------------|----------------------------|--------|-------------|----------------------------|--------|
| 9V  | Linear      | $y = -0.048*x + 0.340$     | 0.1359 | Exponential | $0.000*e^{(-2.684x)}$      | 0.3373 |
| 14  | Logarithmic | $y = (-0.680*LN(x))+1.147$ | 0.8997 | Power       | $y = 14.267*x^{(-17.696)}$ | 0.7249 |
| 18C | Linear      | $y = -0.118*x + 0.512$     | 0.8906 | Power       | $y = 0.000*x^{(-10.824)}$  | 0.3542 |
| 19A | Linear      | $y = 0.062*x + -0.149$     | 0.3295 | Logarithmic | $y = (-0.163*LN(x))+0.787$ | 0.0688 |
| 19F | Logarithmic | $y = (0.002*LN(x))+0.171$  | 0.0328 | Power       | $y = 0.002*x^{(-12.192)}$  | 0.3519 |
| 23F | Linear      | $y = 0.102*x + 0.003$      | 0.6289 | Linear      | $y = -0.015*x + 0.154$     | 0.1631 |
| NVT | Linear      | $y = 0.077*x + 0.272$      | 0.5086 |             |                            |        |

NVT = nonvaccine type.

Note: “-” denotes that no cases of disease were observed due to this serotype in this age group during the period of interest. As such, no trend lines were applied.

**S1 Table 4. Canada-specific Trend Lines by Serotype, Ages 18-34**

| Serotype | Formula     |                             |                | Formula     |                            |                |
|----------|-------------|-----------------------------|----------------|-------------|----------------------------|----------------|
|          | Assumption  | Noncovered Period           | R <sup>2</sup> | Assumption  | Covered Period             | R <sup>2</sup> |
| 1        | Logarithmic | $y = (0.017*LN(x))+ -0.004$ | 0.0987         | -           | -                          | -              |
| 3        | Logarithmic | $y = (0.017*LN(x))+0.172$   | 0.0297         | Logarithmic | $y = (0.100*LN(x))+0.152$  | 0.3212         |
| 4        | Logarithmic | $y = (-0.086*LN(x))+0.668$  | 0.2438         | Logarithmic | $y = (-0.187*LN(x))+0.511$ | 0.6690         |
| 5        | -           | -                           | -              | -           | -                          | -              |
| 6A       | Logarithmic | $y = (-0.010*LN(x))+0.085$  | 0.0314         | Logarithmic | $y = (-0.098*LN(x))+0.127$ | 0.7094         |
| 6B       | Logarithmic | $y = (-0.402*LN(x))+0.595$  | 0.9252         | Power       | $y = 0.138*x^{(-13.036)}$  | 0.3508         |
| 7F       | Linear      | $y = 0.057*x + 0.055$       | 0.4973         | Exponential | $0.424*e^{(-0.213x)}$      | 0.7686         |

|     |             |                                     |        |             |                                     |        |
|-----|-------------|-------------------------------------|--------|-------------|-------------------------------------|--------|
| 9V  | Logarithmic | $y = (-0.055 \cdot \ln(x)) + 0.302$ | 0.5104 | Linear      | $y = -0.039 \cdot x + 0.416$        | 0.7574 |
| 14  | Linear      | $y = -0.051 \cdot x + 0.630$        | 0.5665 | Logarithmic | $y = (-0.148 \cdot \ln(x)) + 0.334$ | 0.7952 |
| 18C | Logarithmic | $y = (0.059 \cdot \ln(x)) + 0.137$  | 0.2771 | Power       | $y = 106.890 \cdot x^{-17.277}$     | 0.6265 |
| 19A | Linear      | $y = 0.059 \cdot x - 0.129$         | 0.8689 | Exponential | $0.523 \cdot e^{(-0.056x)}$         | 0.1202 |
| 19F | Logarithmic | $y = (0.057 \cdot \ln(x)) + 0.081$  | 0.4872 | Exponential | $0.000 \cdot e^{(-0.578x)}$         | 0.0162 |
| 23F | Linear      | $y = -0.079 \cdot x + 0.400$        | 0.8650 | Power       | $y = 709.958 \cdot x^{-18.464}$     | 0.7149 |
| NVT | Logarithmic | $y = (0.127 \cdot \ln(x)) + 1.080$  | 0.0710 |             |                                     |        |

NVT = nonvaccine type.

Note: “-” denotes that no cases of disease were observed due to this serotype in this age group during the period of interest. As such, no trend lines were applied.

**S1 Table 5. Canada-specific Trend Lines by Serotype, Ages 35-49**

| Serotype | Formula     |                                     |                | Formula     |                                     |                |
|----------|-------------|-------------------------------------|----------------|-------------|-------------------------------------|----------------|
|          | Assumption  | Noncovered Period                   | R <sup>2</sup> | Assumption  | Covered Period                      | R <sup>2</sup> |
| 1        | Logarithmic | $y = (0.017 \cdot \ln(x)) - 0.004$  | 0.0987         | -           | -                                   | -              |
| 3        | Logarithmic | $y = (0.017 \cdot \ln(x)) + 0.172$  | 0.0297         | Logarithmic | $y = (0.100 \cdot \ln(x)) + 0.152$  | 0.3212         |
| 4        | Logarithmic | $y = (-0.086 \cdot \ln(x)) + 0.668$ | 0.2438         | Logarithmic | $y = (-0.187 \cdot \ln(x)) + 0.511$ | 0.6690         |
| 5        | -           | -                                   | -              | -           | -                                   | -              |
| 6A       | Logarithmic | $y = (-0.010 \cdot \ln(x)) + 0.085$ | 0.0314         | Logarithmic | $y = (-0.098 \cdot \ln(x)) + 0.127$ | 0.7094         |
| 6B       | Logarithmic | $y = (-0.402 \cdot \ln(x)) + 0.595$ | 0.9252         | Power       | $y = 0.138 \cdot x^{-13.036}$       | 0.3508         |
| 7F       | Linear      | $y = 0.057 \cdot x + 0.055$         | 0.4973         | Exponential | $0.424 \cdot e^{(-0.213x)}$         | 0.7686         |

|     |             |                                           |        |             |                                           |        |
|-----|-------------|-------------------------------------------|--------|-------------|-------------------------------------------|--------|
| 9V  | Logarithmic | $y = (-0.055 \cdot \text{LN}(x)) + 0.302$ | 0.5104 | Linear      | $y = -0.039 \cdot x + 0.416$              | 0.7574 |
| 14  | Linear      | $y = -0.051 \cdot x + 0.630$              | 0.5665 | Logarithmic | $y = (-0.148 \cdot \text{LN}(x)) + 0.334$ | 0.7952 |
| 18C | Logarithmic | $y = (0.059 \cdot \text{LN}(x)) + 0.137$  | 0.2771 | Power       | $y = 106.890 \cdot x^{(-17.277)}$         | 0.6265 |
| 19A | Linear      | $y = 0.059 \cdot x + -0.129$              | 0.8689 | Exponential | $0.523 \cdot e^{(-0.056x)}$               | 0.1202 |
| 19F | Logarithmic | $y = (0.057 \cdot \text{LN}(x)) + 0.081$  | 0.4872 | Exponential | $0.000 \cdot e^{(-0.578x)}$               | 0.0162 |
| 23F | Linear      | $y = -0.079 \cdot x + 0.400$              | 0.8650 | Power       | $y = 709.958 \cdot x^{(-18.464)}$         | 0.7149 |
| NVT | Logarithmic | $y = (0.127 \cdot \text{LN}(x)) + 1.080$  | 0.0710 |             |                                           |        |

NVT = non-vaccine type.

Note: “-” denotes that no cases of disease were observed due to this serotype in this age group during the period of interest. As such, no trend lines were applied.

**S1 Table 6. Canada-specific Trend Lines by Serotype, Ages 50-64**

| Serotype | Formula     |                                           |                | Formula     |                                           |                |
|----------|-------------|-------------------------------------------|----------------|-------------|-------------------------------------------|----------------|
|          | Assumption  | Noncovered Period                         | R <sup>2</sup> | Assumption  | Covered Period                            | R <sup>2</sup> |
| 1        | Logarithmic | $y = (0.033 \cdot \text{LN}(x)) + -0.001$ | 0.0236         | Logarithmic | $y = (0.013 \cdot \text{LN}(x)) + 0.017$  | 0.0154         |
| 3        | Linear      | $y = -0.024 \cdot x + 1.050$              | 0.0840         | Logarithmic | $y = (0.426 \cdot \text{LN}(x)) + 0.402$  | 0.7942         |
| 4        | Logarithmic | $y = (-0.970 \cdot \text{LN}(x)) + 1.796$ | 0.7208         | Logarithmic | $y = (-0.490 \cdot \text{LN}(x)) + 1.266$ | 0.7231         |
| 5        | -           | -                                         | -              | -           | -                                         | -              |
| 6A       | Linear      | $y = -0.010 \cdot x + 0.358$              | 0.0091         | Exponential | $1,727,972.191 \cdot e^{(-9.778x)}$       | 0.7493         |
| 6B       | Logarithmic | $y = (0.470 \cdot \text{LN}(x)) + 0.342$  | 0.2936         | Linear      | $y = -0.018 \cdot x + 0.211$              | 0.3069         |
| 7F       | Linear      | $y = 0.165 \cdot x + -0.234$              | 0.5961         | Logarithmic | $y = (-0.828 \cdot \text{LN}(x)) + 1.391$ | 0.8003         |

|     |             |                            |        |             |                            |        |
|-----|-------------|----------------------------|--------|-------------|----------------------------|--------|
| 9V  | Linear      | $y = -0.137*x + 0.985$     | 0.5113 | Linear      | $y = -0.067*x + 0.703$     | 0.4880 |
| 14  | Logarithmic | $y = (-0.836*LN(x))+2.185$ | 0.5388 | Exponential | $380.993*e^{(-2.743x)}$    | 0.3474 |
| 18C | Logarithmic | $y = (-0.540*LN(x))+0.943$ | 0.8514 | Exponential | $0.000*e^{(-1.183x)}$      | 0.0511 |
| 19A | Linear      | $y = 0.216*x + -0.202$     | 0.7169 | Exponential | $1.639*e^{(-0.139x)}$      | 0.4433 |
| 19F | Logarithmic | $y = (0.162*LN(x))+0.589$  | 0.0523 | Logarithmic | $y = (-0.308*LN(x))+0.694$ | 0.8303 |
| 23F | Linear      | $y = -0.241*x + 1.247$     | 0.6542 | Linear      | $y = -0.020*x + 0.205$     | 0.6181 |
| NVT | Linear      | $y = 0.143*x + 3.337$      | 0.2755 |             |                            |        |

NVT = nonvaccine type.

Note: “-” denotes that no cases of disease were observed due to this serotype in this age group during the period of interest. As such, no trend lines were applied.

**S1 Table 7. Canada-specific Trend Lines by Serotype, Ages 65+**

| Serotype | Formula     |                            |                | Formula     |                            |                |
|----------|-------------|----------------------------|----------------|-------------|----------------------------|----------------|
|          | Assumption  | Noncovered Period          | R <sup>2</sup> | Assumption  | Covered Period             | R <sup>2</sup> |
| 1        | Linear      | $y = 0.014*x + -0.063$     | 0.3000         | Linear      | $y = -0.025*x + 0.124$     | 0.1250         |
| 3        | Logarithmic | $y = (0.323*LN(x))+3.035$  | 0.0642         | Exponential | $3.737*e^{(-0.175x)}$      | 0.4650         |
| 4        | Logarithmic | $y = (-0.758*LN(x))+1.636$ | 0.7017         | Linear      | $y = -0.122*x + 1.191$     | 0.4469         |
| 5        | -           | -                          | -              | -           | -                          | -              |
| 6A       | Logarithmic | $y = (0.262*LN(x))+0.742$  | 0.0933         | Linear      | $y = 0.020*x + 0.339$      | 0.0335         |
| 6B       | Logarithmic | $y = (-0.712*LN(x))+3.375$ | 0.2058         | Logarithmic | $y = (-1.000*LN(x))+2.446$ | 0.9351         |
| 7F       | Linear      | $y = 0.196*x + -0.044$     | 0.6585         | Exponential | $1.855*e^{(-0.302x)}$      | 0.2049         |

|     |             |                                    |        |             |                                     |        |
|-----|-------------|------------------------------------|--------|-------------|-------------------------------------|--------|
| 9V  | Logarithmic | $y = (0.288 \cdot \ln(x)) + 1.144$ | 0.0786 | Linear      | $y = -0.114 \cdot x + 1.149$        | 0.6509 |
| 14  | Linear      | $y = -1.563 \cdot x + 9.245$       | 0.9459 | Exponential | $1.729 \cdot e^{(-0.155x)}$         | 0.5228 |
| 18C | Linear      | $y = -0.338 \cdot x + 1.639$       | 0.9825 | Logarithmic | $y = (-0.347 \cdot \ln(x)) + 0.779$ | 0.6948 |
| 19A | Linear      | $y = 0.438 \cdot x - 0.710$        | 0.8618 | Exponential | $7.309 \cdot e^{(-0.313x)}$         | 0.9141 |
| 19F | Linear      | $y = -0.310 \cdot x + 2.944$       | 0.9294 | Linear      | $y = -0.075 \cdot x + 1.051$        | 0.3157 |
| 23F | Linear      | $y = -0.392 \cdot x + 3.153$       | 0.1128 | Logarithmic | $y = (-0.127 \cdot \ln(x)) + 0.622$ | 0.1721 |
| NVT | Logarithmic | $y = (1.931 \cdot \ln(x)) + 7.865$ | 0.6261 |             |                                     |        |

NVT = nonvaccine type.

Note: "-" denotes that no cases of disease were observed due to this serotype in this age group during the period of interest. As such, no trend lines were applied.

**S1 Fig 1. Forecasted IPD Incidence for Persons by Age Groups.**

**S1 Fig 1a. Forecasted Incidences for Persons 5-17 Years of Age.**

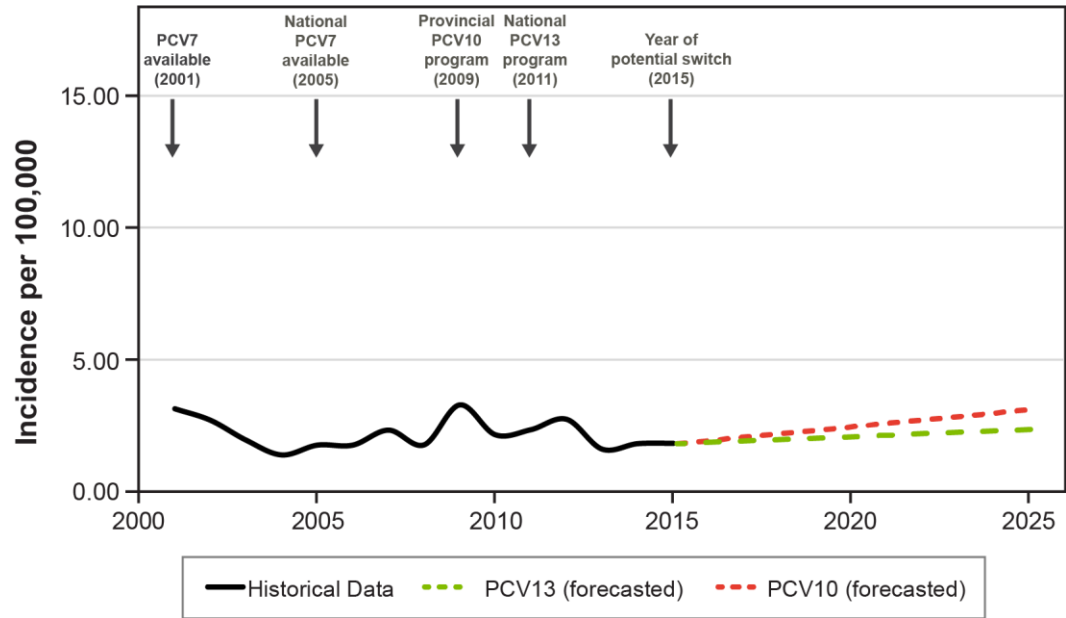

**S1 Fig 1b. Forecasted Incidences for Persons 18-49 Years of Age.**

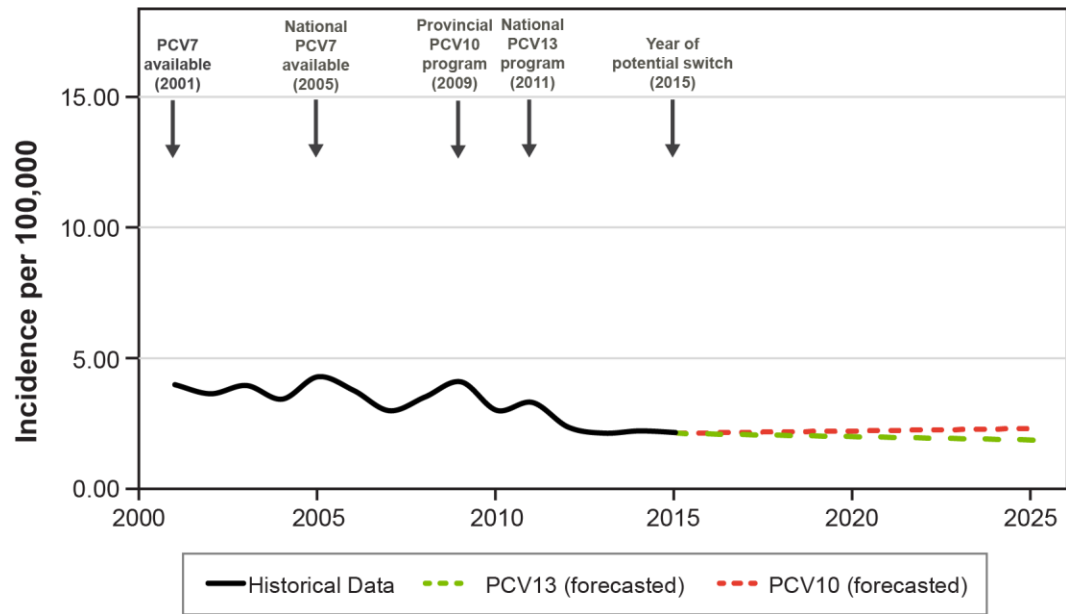



**S1 Fig 1c. Forecasted Incidences for Persons 50-64 Years of Age.**

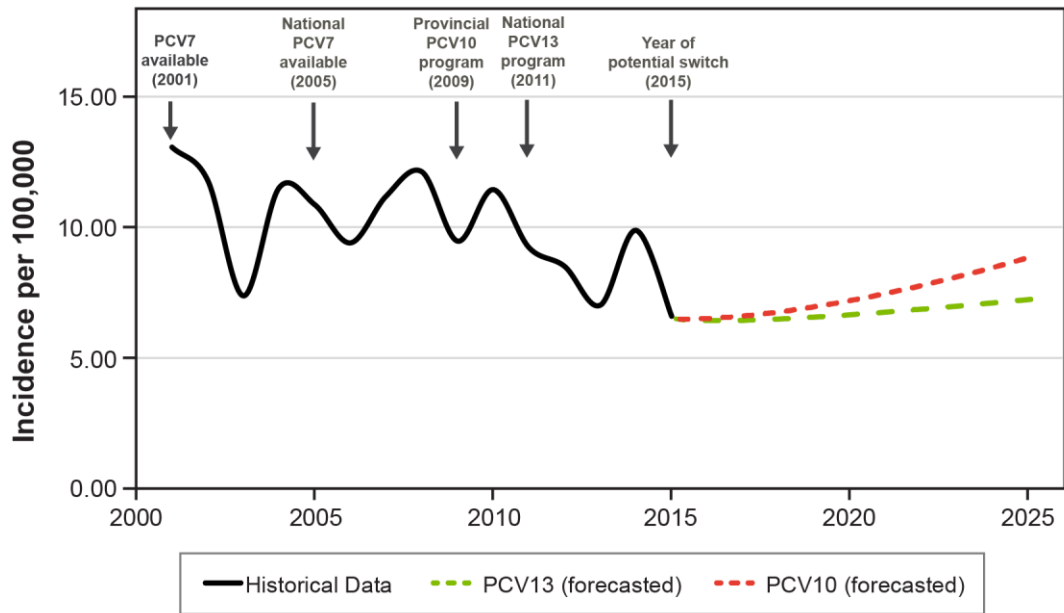

**S1 Fig 2. Scenario Analysis Trends for Persons 0-2 Years of Age.**

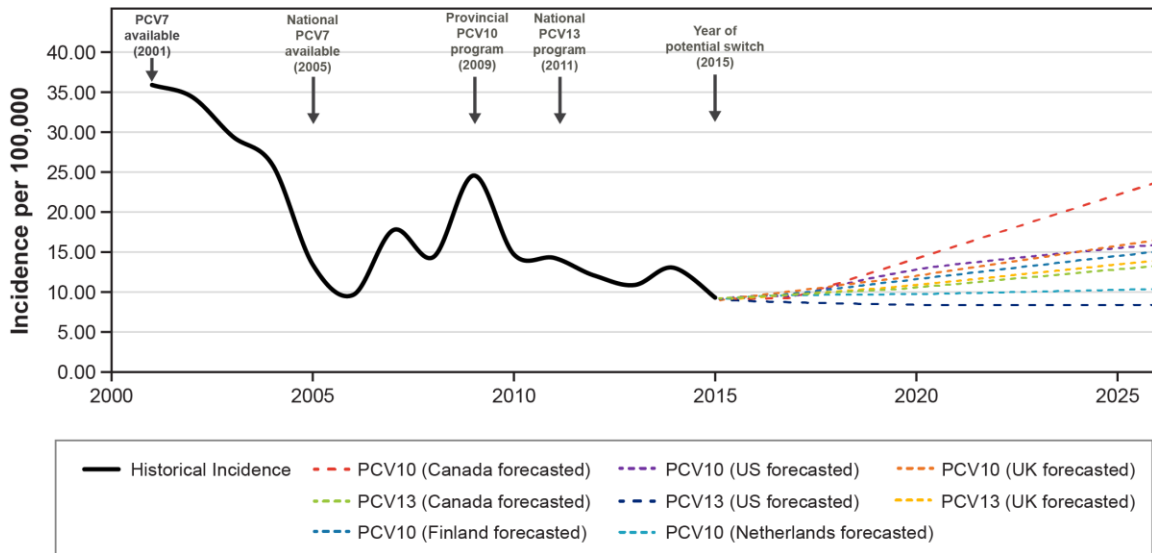

**S1 Fig 3. Scenario Analysis Trends for Persons ≥ 65 Years of Age.**

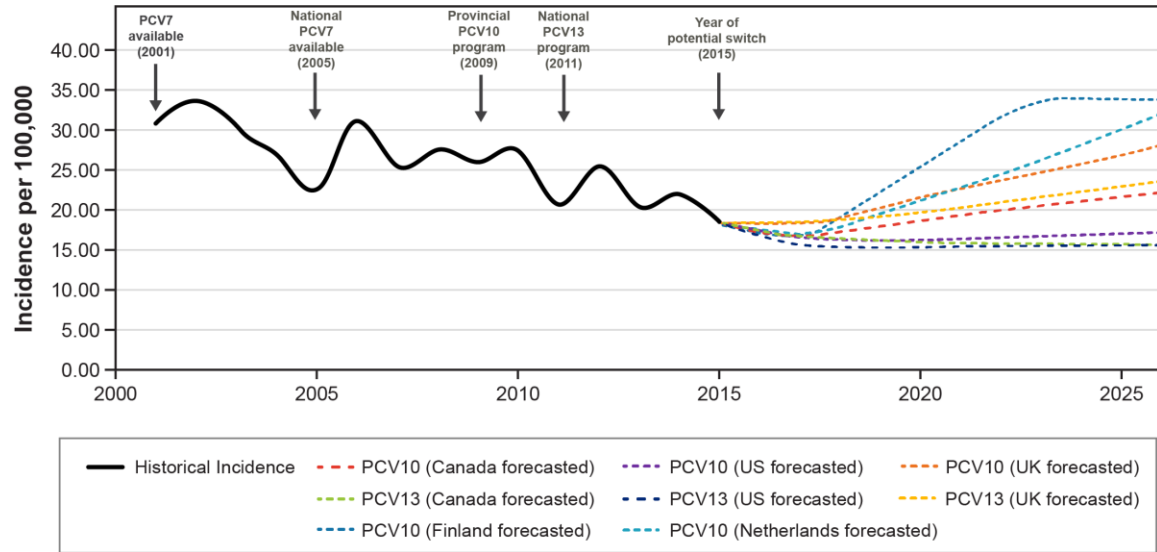

Supplement: MOESM1 [file 15867410]
